# Supplementary material for: High responsivity and stability of MSM structured MoS2 photodetectors by remote hydrogen plasma treatment and alternating growth of Al2O3/HfO2 passivation layers
Source: Royal Society of Chemistry journal article supplement (doi:10.1039/d4ta01523a), 2024-01-01
Supplement: d4ta01523a1.pdf [file d4ta01523a1.pdf]

## SUPPORTING INFORMATION

### **High responsivity and stability of MSM structured MoS<sub>2</sub> photodetectors by remote hydrogen plasma treatment and alternating growth of Al<sub>2</sub>O<sub>3</sub>/HfO<sub>2</sub> passivation layers**

Yulin Li<sup>a</sup>, Yajun Tian<sup>a</sup>, Lingjie Bao<sup>a</sup>, Haoran Cheng<sup>a,\*</sup> and Qijin Cheng<sup>a,\*</sup>

<sup>a</sup>) School of Electronic Science and Engineering, Xiamen University, Xiamen, 361102,  
P. R. China.

\*Corresponding author. Tel: +86592-2188342

E-mail address: qijin.cheng@xmu.edu.cn (Qijin Cheng)

chr0247@gmail.com (Haoran Cheng)

**Supporting Note 1: The photographs of the MSM structured MoS<sub>2</sub>**

photodetector before and after passivation of  $\text{Al}_2\text{O}_3/\text{HfO}_2$ .

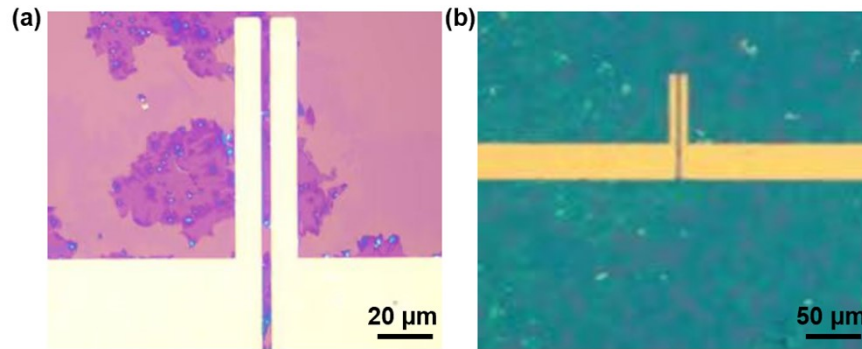

Fig. S1 Optical microscope images of (a) the MSM structured  $\text{MoS}_2$  photodetector and (b) the MSM structured  $\text{MoS}_2$  photodetector with 20 nm alternating grown  $\text{Al}_2\text{O}_3/\text{HfO}_2$  passivation layers.

**Supporting Note 2: The photocurrent and dark current of the pristine  $\text{MoS}_2$  photodetector (Device A) before and after the passivation of  $\text{Al}_2\text{O}_3/\text{HfO}_2$ .**

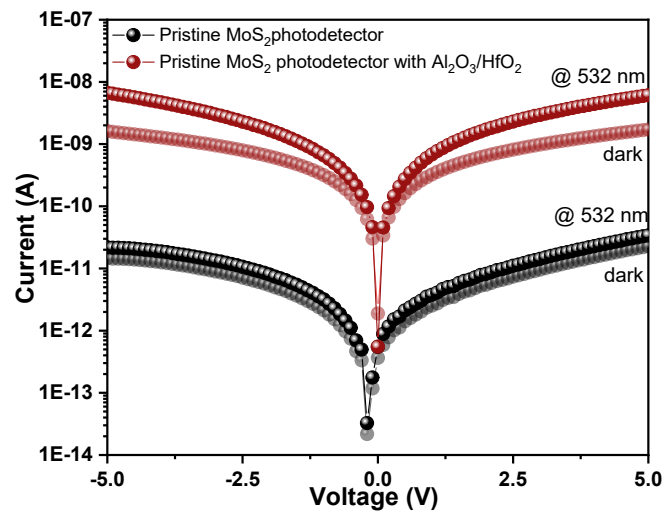

**Fig. S2** Current-voltage characteristic curves of the pristine  $\text{MoS}_2$  photodetector before and after the passivation of  $\text{Al}_2\text{O}_3/\text{HfO}_2$  under dark condition and 532 nm light illumination.

From Fig. S2, one can notice that, after the passivation of  $\text{Al}_2\text{O}_3/\text{HfO}_2$ , both the photocurrent and dark current of the pristine  $\text{MoS}_2$  photodetector increase. The increase of the photocurrent and the dark current may be related to the following factors: (i)  $\text{Al}_2\text{O}_3/\text{HfO}_2$  passivation reduces the Schottky barrier height between the metal electrode

and MoS<sub>2</sub>, which can increase the possibility of tunneling process and thermionic emission process; (ii) Al<sub>2</sub>O<sub>3</sub>/HfO<sub>2</sub> passivation effectively separates water and oxygen molecules from the surface of MoS<sub>2</sub>, and creates additional conduction pathways through electrostatic doping of fixed positive charges on the MoS<sub>2</sub> surface; (iii) the suppression of Coulomb scattering in MoS<sub>2</sub> after deposition of high-k dielectric materials.

**Supporting Note 3: Performance comparison of Device B and Device C before and after two months of placement in the atmosphere environment.**

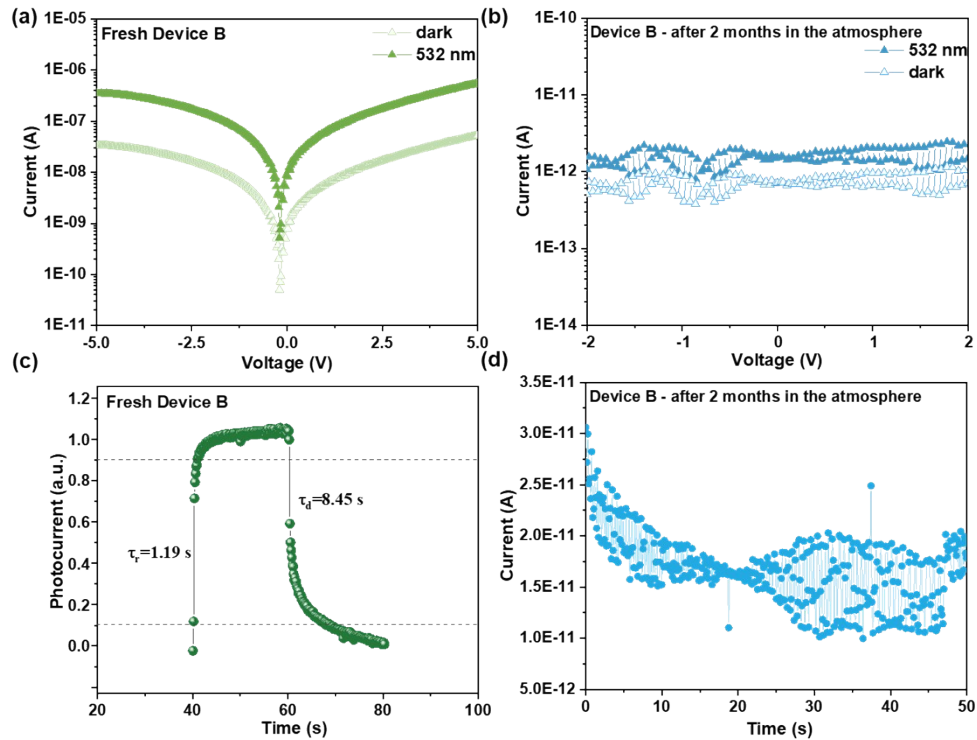

**Fig. S3** I-V characteristic curves of (a) fresh Device B and (b) Device B after 2 months of placement in the atmospheric environment under dark condition and 532 nm light illumination. One-cycle time-dependent photoresponses of (c) fresh Device B and (d) Device B after 2 months of placement in the atmospheric environment under 532 nm light illumination. In order to facilitate observation and calculation of 10%-90% response time, only the data between 40-80s points are retained in the figure.

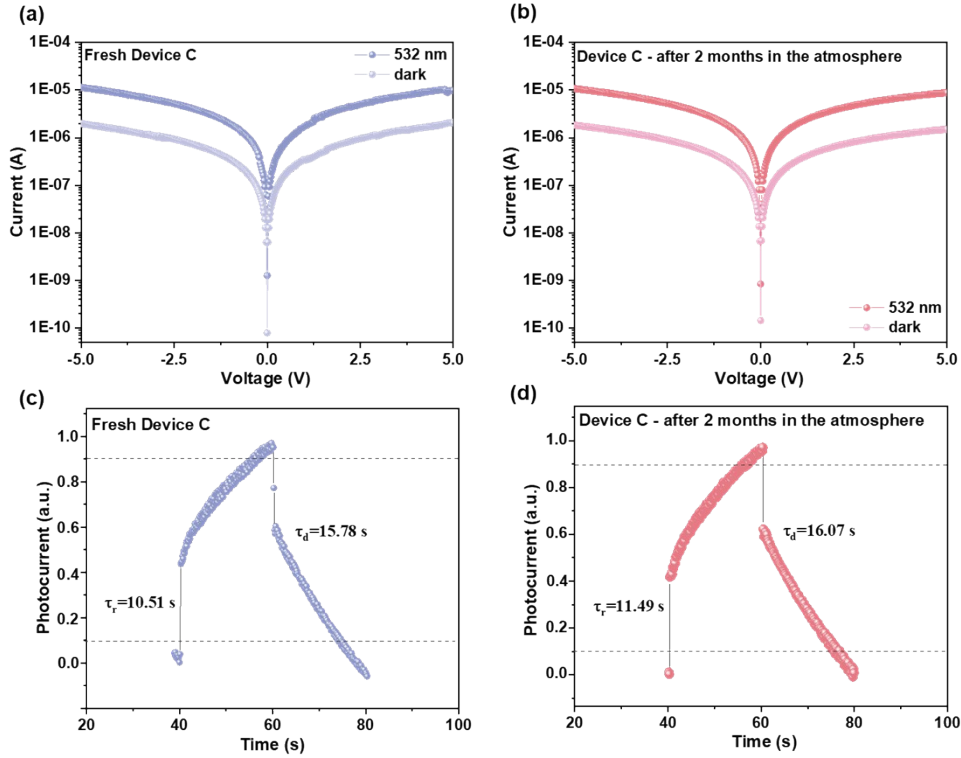

**Fig. S4** I-V characteristic curves of (a) fresh Device C and (b) Device C after two months of placement in the atmospheric environment under dark condition and 532 nm light illumination. One-cycle time-dependent photoresponses of (c) fresh Device C and (d) Device C after two months of placement in the atmospheric environment under 532 nm light illumination. In order to facilitate observation and calculation of 10%-90% response time, only the data between 40-80s points are retained in the figure.

From Fig. S3a-d, one can notice that, after being exposed to the atmospheric environment for two months, Device B has completely lost its photoresponse characteristics. The current-voltage characteristic curve and one-cycle time-dependent photoresponse of Device B after being placed in the atmospheric environment for 2 months can not be tested as shown in Fig. S3c and d. From Fig. S4a-d, it can be observed that, after 2 months of placement in the atmospheric environment, Device C shows negligible change in both the photocurrent and the dark current, remaining the same

order of magnitude as the fresh device. Through formulas  $R_{\lambda} = \frac{I_{ph}}{A * P}$  and

$D^* \approx \frac{\sqrt{AR_{\lambda}}}{\sqrt{2eI_{dark}}}$ , we can determine that the responsivity and the specific detectivity of

Device C after being placed in the atmospheric environment for 2 months are 540.61 A/W and  $1.06 \times 10^{10}$  Jones at a bias of -5 V, respectively. The responsivity and the specific detectivity are maintained at approximately 95% of the fresh Device C. From Fig. S4d, one can notice that the response time ( $\tau_r/\tau_d$ ) of Device C after being placed in the atmospheric environment for 2 months is 11.49/16.07 s. In comparison with the fresh Device C, the response time slightly increases.

**Supporting Note 4: Photoelectric performance of five fabricated photodetectors under the same condition as Device C before and after 2 months of placement in atmospheric environment**

In order to further substantiate the stability and repeatability of the fabricated MoS<sub>2</sub> photodetectors, we have fabricated five photodetectors under the same condition as Device C and measured their photoelectric performance. We have listed the responsivity and specific detectivity of these five photodetectors before and after 2 months of placement in atmospheric environment in Tables S1. The responsivity and specific detectivity were also calculated at bias of -5 V under 532 nm light illumination. From Table S1, the average values of the responsivity and specific detectivity of these fresh devices are 559.82 A/W and  $1.19 \times 10^{10}$  Jones, respectively. The standard deviations of responsivity and specific detectivity of these fresh devices are 13.09 A/W and  $1.10 \times 10^9$  Jones, respectively. The average values of the responsivity and specific detectivity of these devices after two months of placement in the atmospheric environment are 532.36 A/W and  $1.13 \times 10^{10}$  Jones, respectively. The standard deviations of responsivity and specific detectivity of these devices after two months of placement in the atmospheric environment are 12.73 A/W and  $1.13 \times 10^9$  Jones, respectively. Our results indicate that Device C is highly reproducible.

**Table S1.** Responsivity and specific detectivity of the fabricated five photodetectors under the same condition as Device C before and after 2 months of placement in atmospheric environment

| Device | Responsivity | Specific detectivity | Responsivity | Specific detectivity |
|--------|--------------|----------------------|--------------|----------------------|
|--------|--------------|----------------------|--------------|----------------------|

|          | (A/W)  | (Jones)               | (A/W)                  | (Jones)               |
|----------|--------|-----------------------|------------------------|-----------------------|
|          | Fresh  |                       | 2 months in atmosphere |                       |
| Device 1 | 567.00 | $1.12 \times 10^{10}$ | 540.61                 | $1.06 \times 10^{10}$ |
| Device 2 | 537.16 | $1.32 \times 10^{10}$ | 510.42                 | $1.28 \times 10^{10}$ |
| Device 3 | 572.34 | $1.06 \times 10^{10}$ | 544.66                 | $1.02 \times 10^{10}$ |
| Device 4 | 553.25 | $1.30 \times 10^{10}$ | 525.67                 | $1.25 \times 10^{10}$ |
| Device 5 | 569.37 | $1.09 \times 10^{10}$ | 540.43                 | $1.03 \times 10^{10}$ |

### Supporting Note 5: Electrical properties of alternating grown Al<sub>2</sub>O<sub>3</sub>/HfO<sub>2</sub> passivation layers.

In this work, the electrical properties of alternating grown Al<sub>2</sub>O<sub>3</sub>/HfO<sub>2</sub> passivation layers (abbreviated as AGAHPLs here) also play a significant role in the performance of the MoS<sub>2</sub> photodetector. Therefore, we fabricated a Ti/Cu/AGAHPLs/p<sup>+</sup>-Si metal-oxide-semiconductor (MOS) capacitor to obtain the electrical properties of AGAHPLs (the schematic diagram of the capacitor's structure is shown in Fig. S5a). The capacitance-voltage (C-V) characteristic curve of the Ti/Cu/AGAHPLs/p<sup>+</sup>-Si MOS capacitor is shown in Fig. S5b. In Fig. S5b,  $V_{fb}$  represents the flat-band voltage of the semiconductor surface energy band, which is used to eliminate the influence of oxide layers and interface charges<sup>1</sup>. It is an essential parameter for determining the polarity of fixed charges.  $V_{fb}$  is determined by the abscissa value corresponding to  $C_{fb}$ .  $C_{fb}$  can be calculated using the following formula<sup>2</sup>:

$$C_{fb} = \frac{C_{ox}}{\left(1 + \frac{\varepsilon_{ox}}{\varepsilon_s t_{ox}} \sqrt{\frac{kT \varepsilon_0 \varepsilon_s}{e^2 N_A}}\right)} \quad (1)$$

where  $C_{ox}$  is the capacitance of the gate oxide ( $C_{ox} = C_{max} = 1.435$  nF as shown in Fig. S5b);  $\varepsilon_s$  is the relative dielectric constant of p<sup>+</sup>-Si ( $\varepsilon_s = 11.9$ );  $t_{ox}$  is the total thickness of the oxide layer ( $t_{ox} = 20$  nm in this work, as shown in Fig. S5c and d);  $k$  is the Boltzmann constant ( $k = 1.38 \times 10^{-23}$  J/K);  $T$  is the absolute temperature ( $T = 300$  K);  $\varepsilon_0$  is the vacuum dielectric constant ( $\varepsilon_0 = 8.85 \times 10^{-12}$  F/m);  $e$  is the

elementary charge ( $e=1.602\times 10^{-19}$  C);  $N_A$  is the p<sup>+</sup>-Si doping concentration ( $N_A\approx 10^{19}$  cm<sup>-3</sup> in this work);  $\epsilon_{ox}$  is the relative dielectric constant of AGAHPLs (calculated from the formula  $C_{ox} = A \frac{\epsilon_0 \epsilon_{ox}}{t_{ox}}$ , where  $A$  is the area of metal electrodes ( $A=0.25\times 10^{-6}$  m<sup>2</sup> in this work), giving rise to  $\epsilon_{ox}=12.97$ ). According to Equation (1), the calculated  $C_{fb}$  is 1.340 nF, corresponding to  $V_{fb}$  of -1.682 V, as shown in Fig. S5b.

Based on the obtained electrical parameters of the Ti/Cu/AGAHPLs/p<sup>+</sup>-Si capacitor from the above analysis, we can determine the fixed oxide charge density ( $Q_{ox}$ ) of alternating grown Al<sub>2</sub>O<sub>3</sub>/HfO<sub>2</sub> passivation layers using the following formula<sup>3, 4</sup>:

$$Q_{ox} = \frac{-C_{ox}(V_{fb} + V_{ms})}{eA} \quad (2)$$

where  $V_{ms}$  is the contact potential difference between the metal (Ti) and the p<sup>+</sup> Si ( $V_{ms} = \frac{W_s - W_m}{e} = \frac{5.23 \text{ eV} - 4.33 \text{ eV}}{e} = 0.9 \text{ V}$ ). According to Equation (2), the calculated  $Q_{ox}$  for AGAHPLs is  $2.801\times 10^{12}$  cm<sup>-2</sup>, higher than  $Q_{ox}$  for SiO<sub>2</sub> ( $\sim 10^{10}$  cm<sup>-2</sup>)<sup>5</sup>. Both the negative  $V_{fb}$  and the positive  $Q_{ox}$  indicate that alternating grown Al<sub>2</sub>O<sub>3</sub>/HfO<sub>2</sub> passivation layers carry high fixed positive charges<sup>6</sup>.

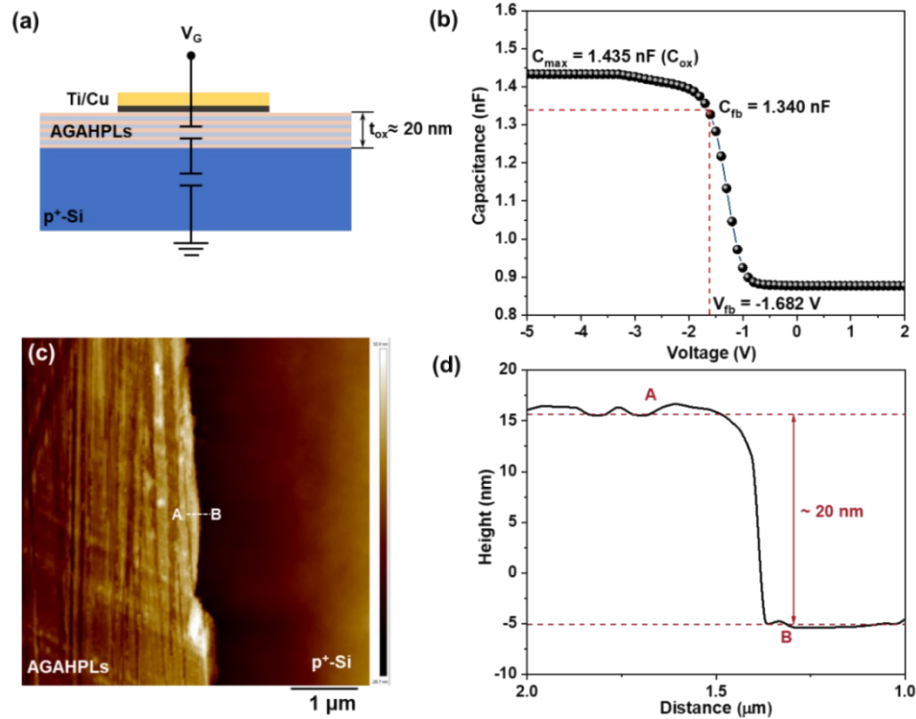

**Fig. S5** (a) Schematic diagram of the Ti/Cu/AGAHPLs/p<sup>+</sup>-Si MOS capacitor's structure. (b) C-V characteristic curve of the Ti/Cu/AGAHPLs/p<sup>+</sup>-Si MOS capacitor. (c) AFM image of AGAHPLs. (d) AFM height profile between point A and point B shown in Fig. S5c.

## References

1. J. Fan, H. Liu, Q. Kuang, B. Gao, F. Ma and Y. Hao, *Microelectron. Reliab.*, 2012, **52**, 1043.
2. L. Hao, G. He, G. Zheng, Q. Gao, L. Qiao and Z. Fang, *ACS Appl. Electron. Mater.*, 2021, **3**, 872.
3. L. Hao, G. He, Z. Fang, D. Wang, Z. Sun and Y. Liu, *Appl. Surf. Sci.*, 2020, **508**, 145273.
4. H. J. Quah, W. F. Lim, K. Y. Cheong, Z. Hassan and Z. Lockman, *J. Cryst. Growth*, 2011, **326**, 2.
5. H. Wong and H. Iwai, *Microelectron. Eng.*, 2006, **83**, 1867.
6. M. Shahinur Rahman, E. K. Evangelou, N. Konofaos and A. Dimoulas, *J. Appl. Phys.*, 2012, **112**, 094501
